# Supplementary material for: Applying local interpretable model-agnostic explanations to identify substructures that are responsible for mutagenicity of chemical compounds
Source: Royal Society of Chemistry journal article supplement (doi:10.1039/d4me00038b), 2024-01-01
Supplement: d4me00038b1.pdf [file d4me00038b1.pdf]

1       **Applying local interpretable model-agnostic explanations to identify**  
2       **substructures that are responsible for mutagenicity of chemical**  
3       **compounds**

4

5               Lucca Caiaffa Santos Rosa and Andre Silva Pimentel\*

6   Departamento de Química, Pontifícia Universidade Católica do Rio de Janeiro,  
7                               Rio de Janeiro, RJ 22453-900, Brazil.

8

9   \*Corresponding author: [a\\_pimentel@puc-rio.br](mailto:a_pimentel@puc-rio.br)

10

11

**Supplementary Material**

12

13

14 **Table S1.** Metrics (mean ROC-AUC) of the training and validation datasets for the  
15 Rain Forest (RF), and Extra Trees (ET) classifier models for three different runs (#1,  
16 #2, and #3) with 10x5-nested cross-validation after resampling for the mutagenicity  
17 of compounds using the Hansen and Bursi Ames mutagenicity datasets.

18

19

20

21

22

23

24

25

26

27

28

29

30

31

|         |       | ROC-AUC score         |                         |
|---------|-------|-----------------------|-------------------------|
| Dataset | Model | Precision of Training | Precision of validation |
| Hansen  | RF    | 0.90                  | 0.83                    |
|         | ET    | 0.92                  | 0.84                    |
| Bursi   | RF    | 0.92                  | 0.90                    |
|         | ET    | 0.94                  | 0.91                    |

32 **Table S2.** The precision, recall, F1, and accuracy, Matthew correlation coefficient  
 33 (MCC), and Cohen's kappa ( $\kappa$ ) scores for the Random Forest (RF) and Extra  
 34 Trees (ET) classifier models in three different runs (#1, #2, and #3) for the training  
 35 dataset of mutagenicity of compounds using resampling method with 5-fold cross-  
 36 validation.

| Dataset | Model | Scores    |        |       |          |       |          |
|---------|-------|-----------|--------|-------|----------|-------|----------|
|         |       | Precision | Recall | F1    | Accuracy | MCC   | $\kappa$ |
| Bursi   | RF #1 | 0.978     | 0.878  | 0.929 | 0.929    | 0.863 | 0.859    |
|         | RF #2 | 0.977     | 0.891  | 0.935 | 0.935    | 0.874 | 0.870    |
|         | RF #3 | 0.974     | 0.893  | 0.933 | 0.933    | 0.870 | 0.867    |
|         | ET #1 | 0.988     | 0.906  | 0.948 | 0.948    | 0.898 | 0.895    |
|         | ET #2 | 0.991     | 0.919  | 0.955 | 0.955    | 0.913 | 0.910    |
|         | ET #3 | 0.990     | 0.916  | 0.953 | 0.953    | 0.909 | 0.907    |
| Hansen  | RF #1 | 0.953     | 0.866  | 0.911 | 0.911    | 0.826 | 0.823    |
|         | RF #2 | 0.968     | 0.858  | 0.915 | 0.915    | 0.835 | 0.830    |
|         | RF #3 | 0.958     | 0.868  | 0.915 | 0.915    | 0.834 | 0.830    |
|         | ET #1 | 0.970     | 0.877  | 0.925 | 0.925    | 0.854 | 0.851    |
|         | ET #2 | 0.973     | 0.895  | 0.935 | 0.935    | 0.874 | 0.871    |
|         | ET #3 | 0.976     | 0.887  | 0.933 | 0.933    | 0.870 | 0.867    |

37  
 38  
 39

40

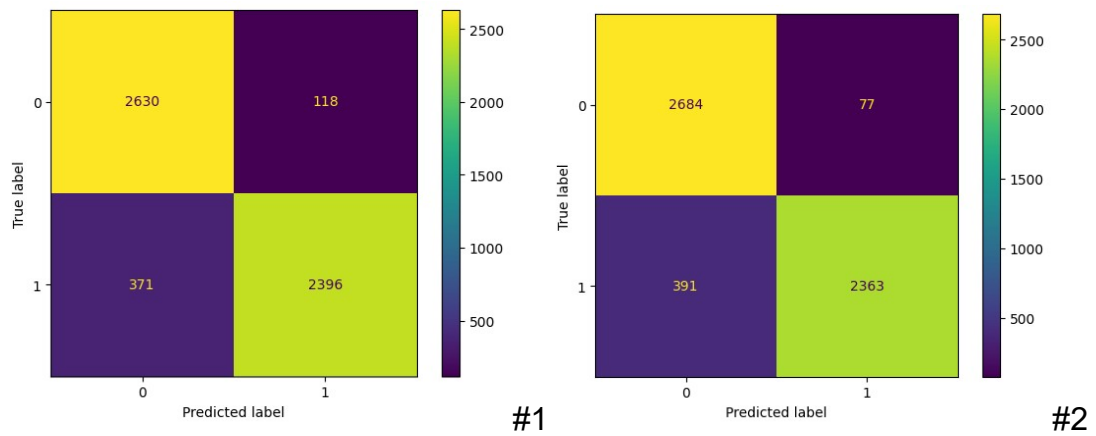

41

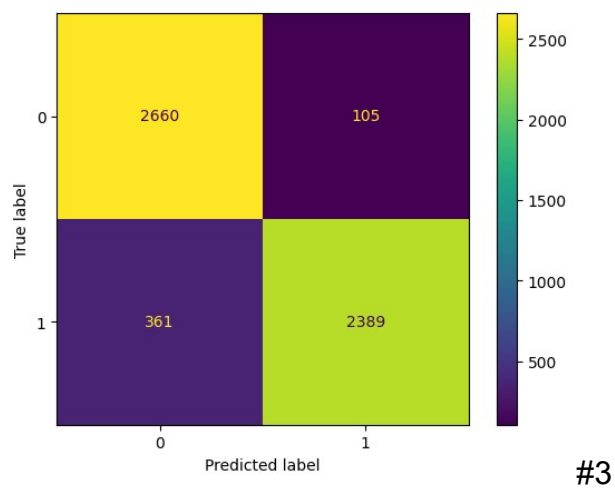

42

43 **Figure S1.** The confusion matrix for the RF classification models using resampling  
44 method and 5-fold cross-validation of the Hansen mutagenicity training dataset for  
45 the runs #1, #2, and #3.

46

47

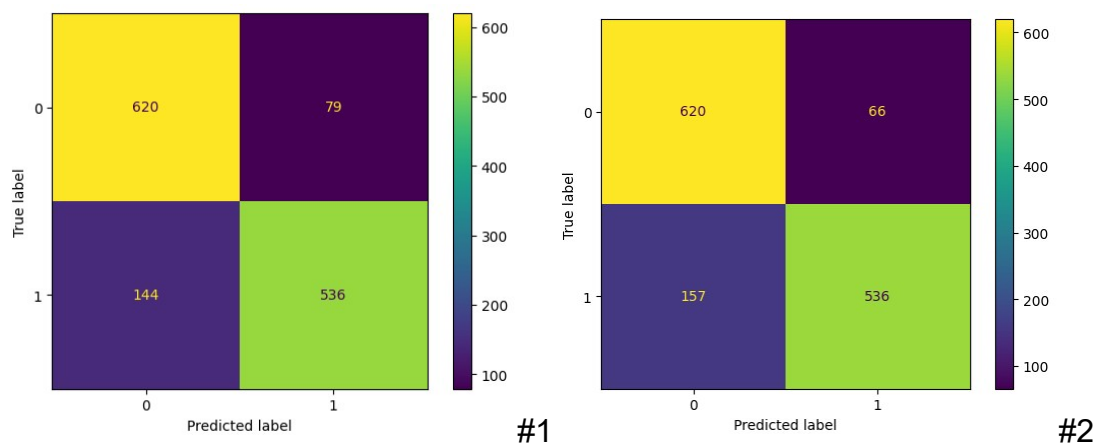

48

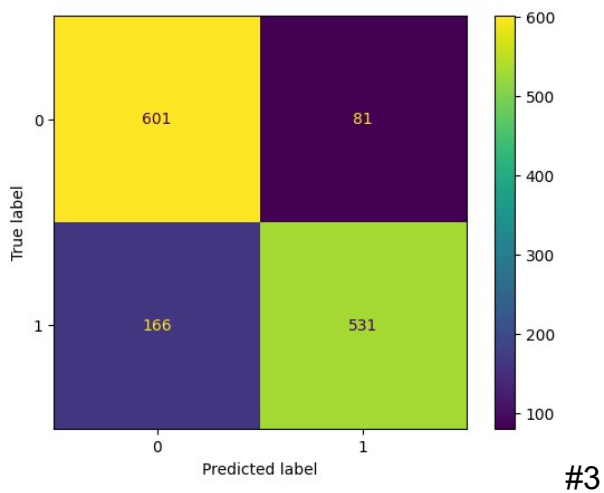

49

50 **Figure S2.** The confusion matrix for the RF classification models using resampling  
51 method and 5-fold cross-validation of the Hansen mutagenicity validation dataset  
52 for the runs #1, #2, and #3.

53

54

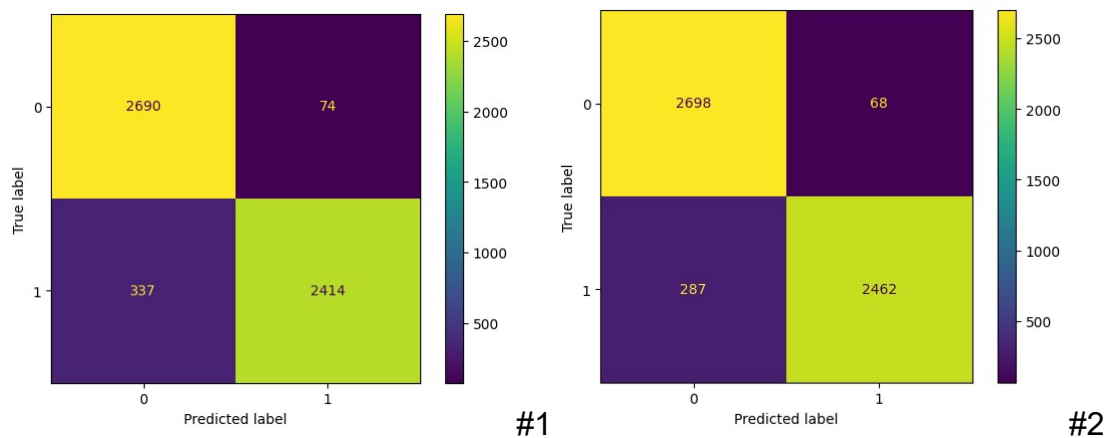

55

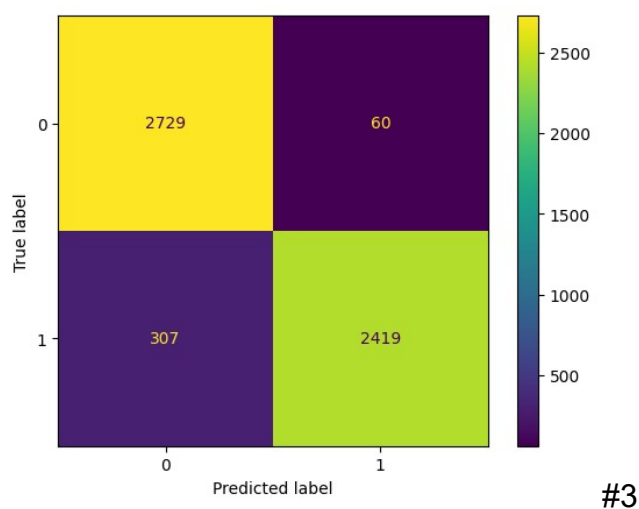

56

57 **Figure S3.** The confusion matrix for the ET classification models using resampling  
58 method and 5-fold cross-validation of the Hansen mutagenicity training dataset for  
59 the runs #1, #2, and #3.

60

61

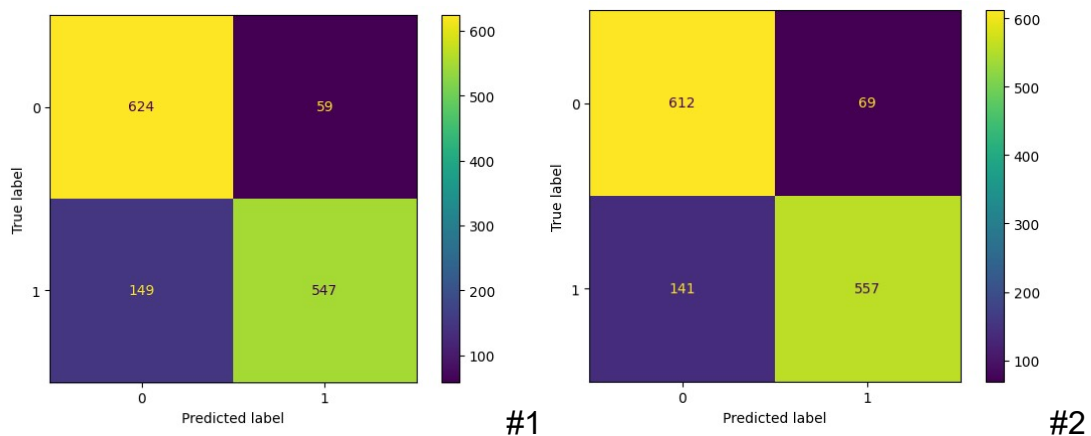

62

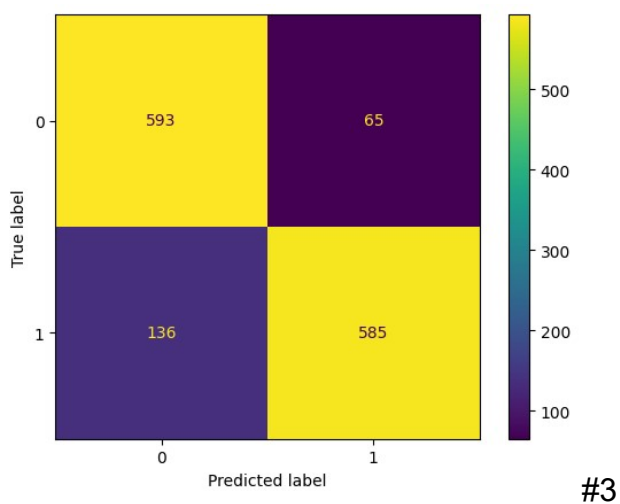

63

64 **Figure S4.** The confusion matrix for the ET classification models using resampling  
65 method and 5-fold cross-validation of the Hansen mutagenicity validation dataset  
66 for the runs #1, #2, and #3.

67

68

69

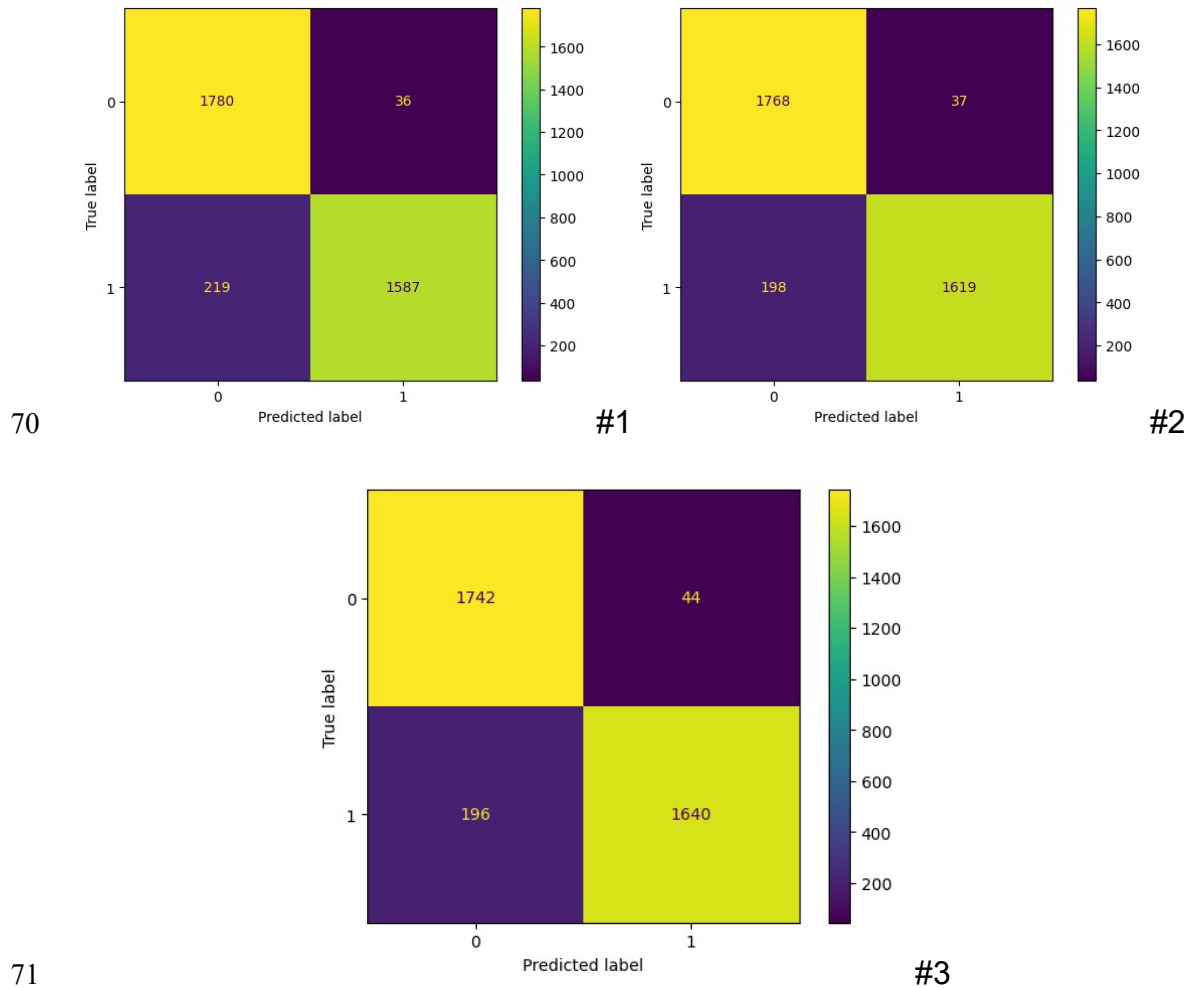

72 **Figure S5.** The confusion matrix for the RF classification models using resampling  
73 method and 5-fold cross-validation of the Bursi mutagenicity training dataset for  
74 the runs #1, #2, and #3.

75



76

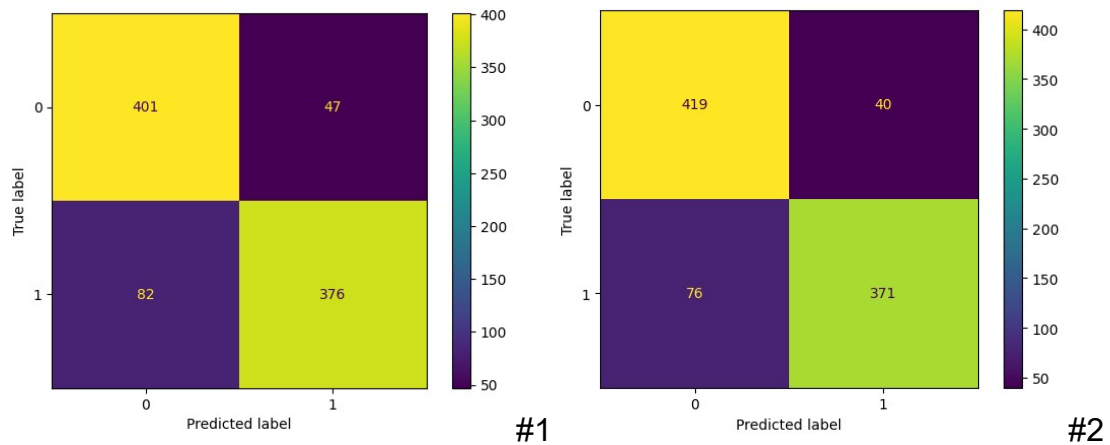

77

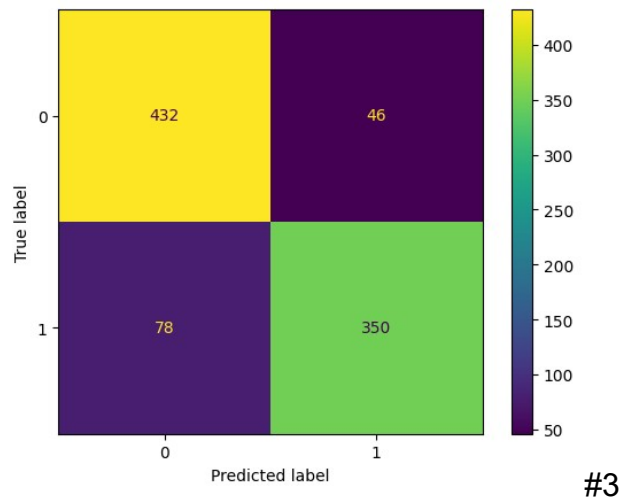

78

79 **Figure S6.** The confusion matrix for the RF classification models using resampling  
80 method and 5-fold cross-validation of the Bursi mutagenicity validation dataset for  
81 the runs #1, #2, and #3.

82

83

84

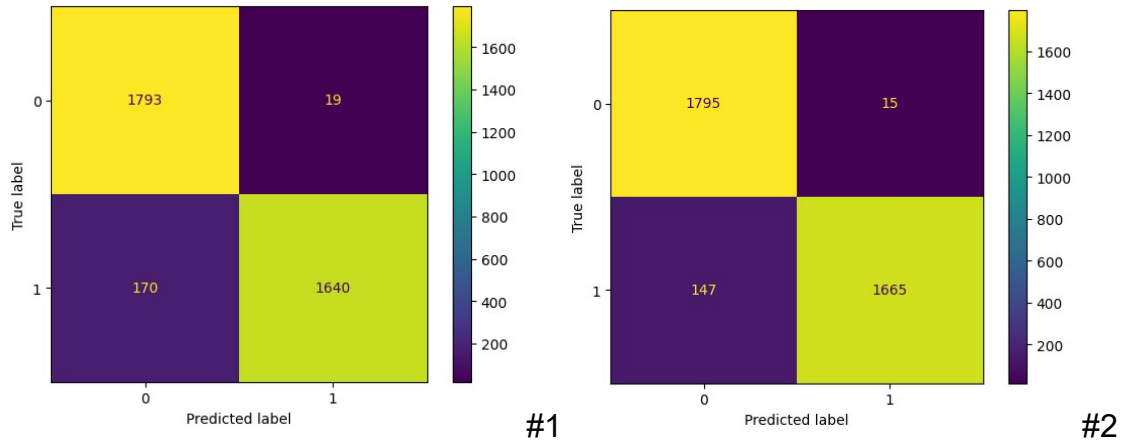

85

#1

#2

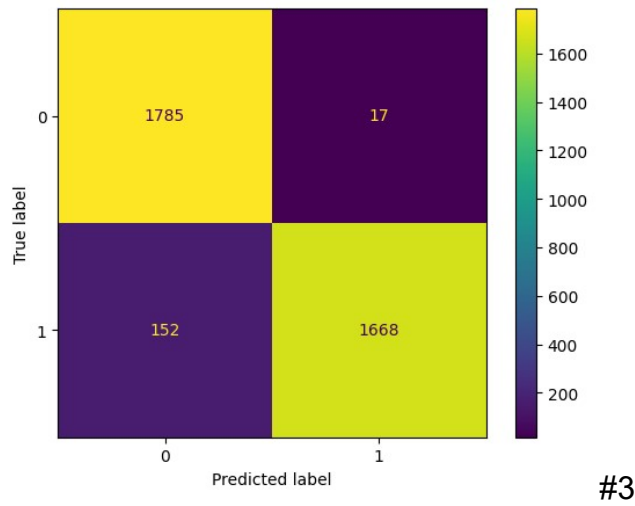

86

#3

87 **Figure S7.** The confusion matrix for the ET classification models using resampling  
88 method and 5-fold cross-validation of the Bursi mutagenicity training dataset for  
89 the runs #1, #2, and #3.

90

91

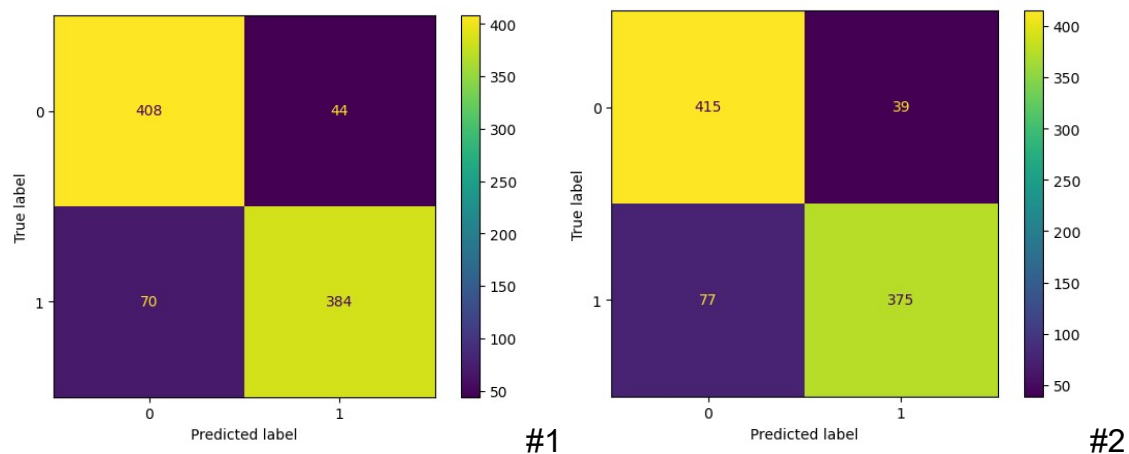

93

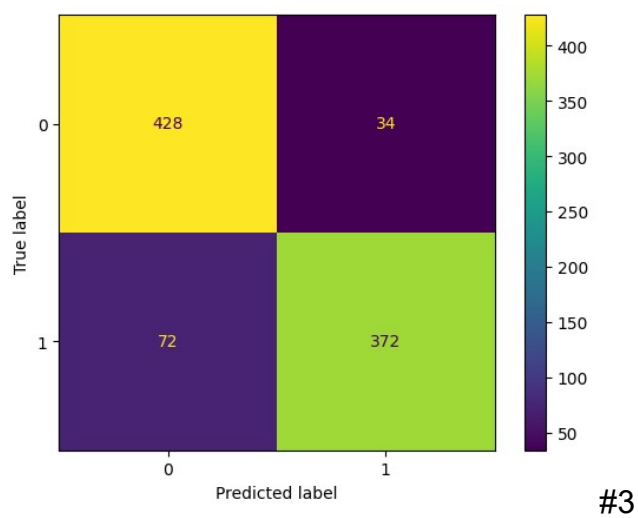

94 **Figure S8.** The confusion matrix for the ET classification models using resampling  
95 method and 5-fold cross-validation of the Bursi mutagenicity validation dataset for  
96 the runs #1, #2, and #3.

97

98

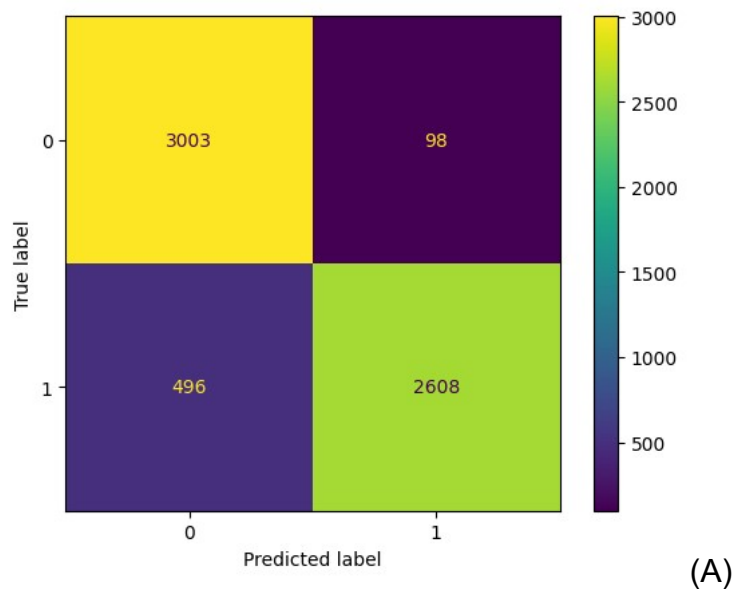

99

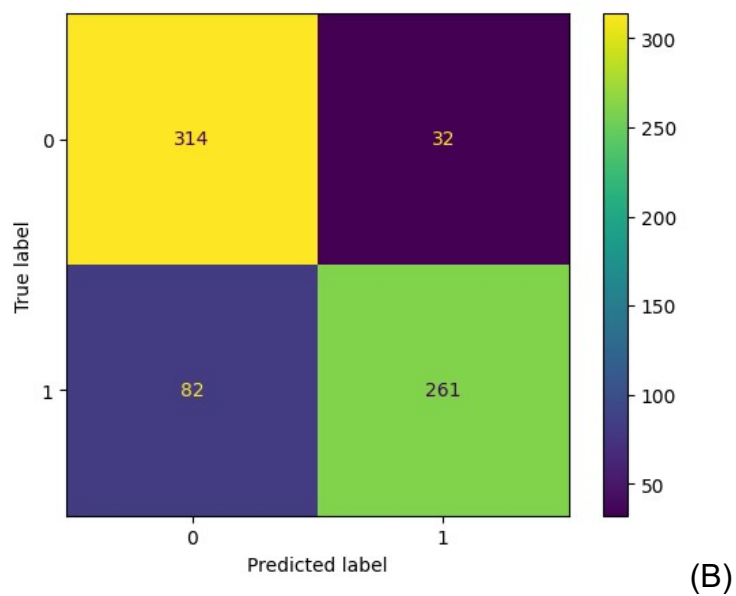

100

101 **Figure S9.** The confusion matrix for the RF classification models using resampling  
102 method and 10x5-nested cross-validation of the Hansen mutagenicity training (A)  
103 and validation (B) datasets.

104

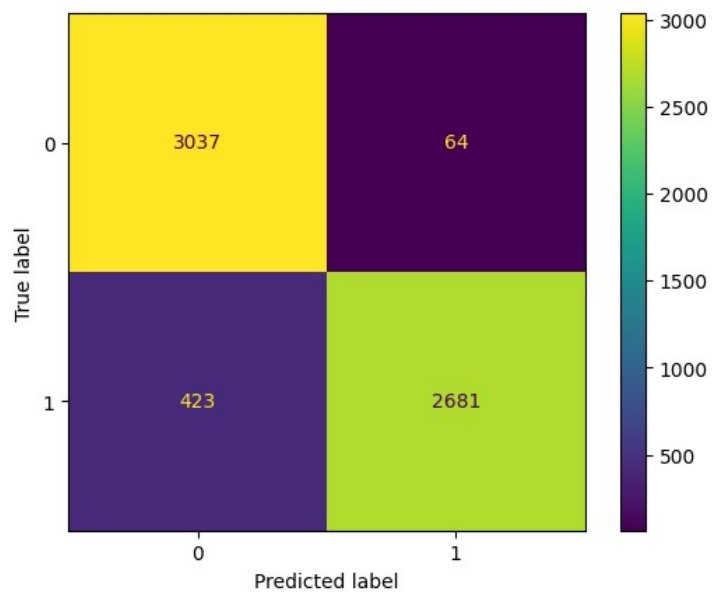

105

(A)

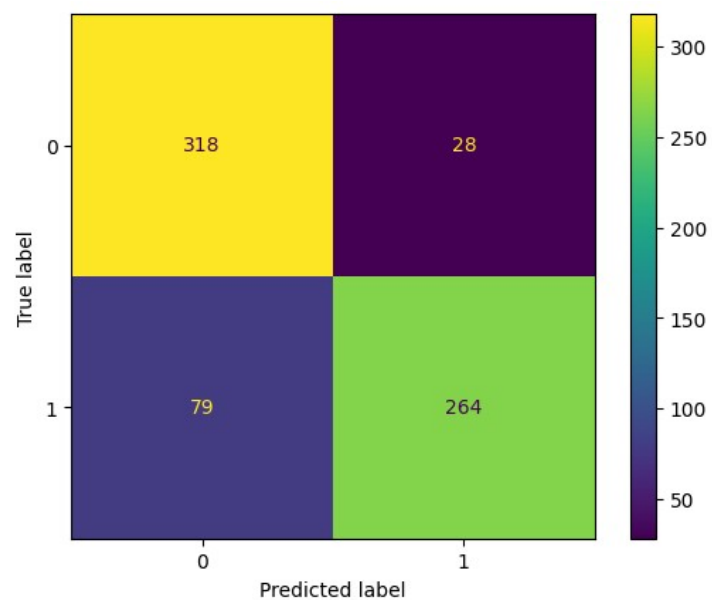

106

(B)

107 **Figure S10.** The confusion matrix for the ET classification models using  
 108 resampling method and 10x5-nested cross-validation of the Hansen mutagenicity  
 109 training (A) and validation (B) datasets.

110

111

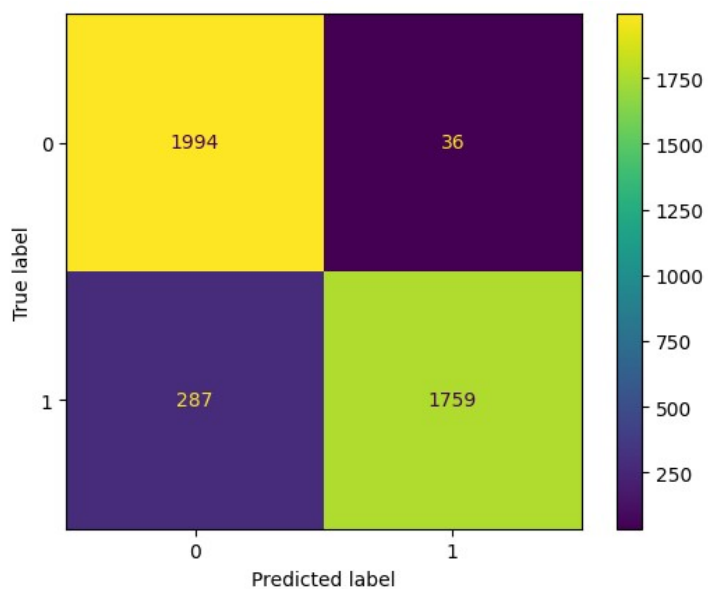

112

(A)

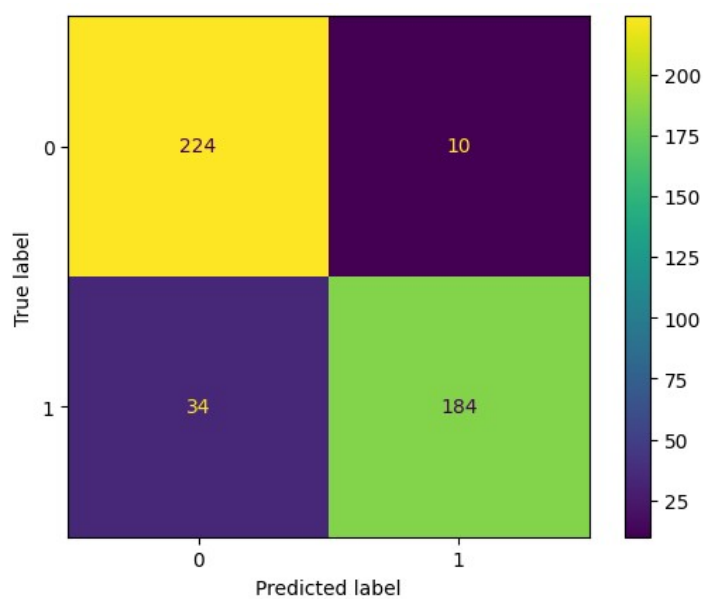

113

(B)

114 **Figure S11.** The confusion matrix for the RF classification models using  
115 resampling method and 10x5-nested cross-validation of the Bursi mutagenicity  
116 training (A) and validation (B) datasets.

117

118

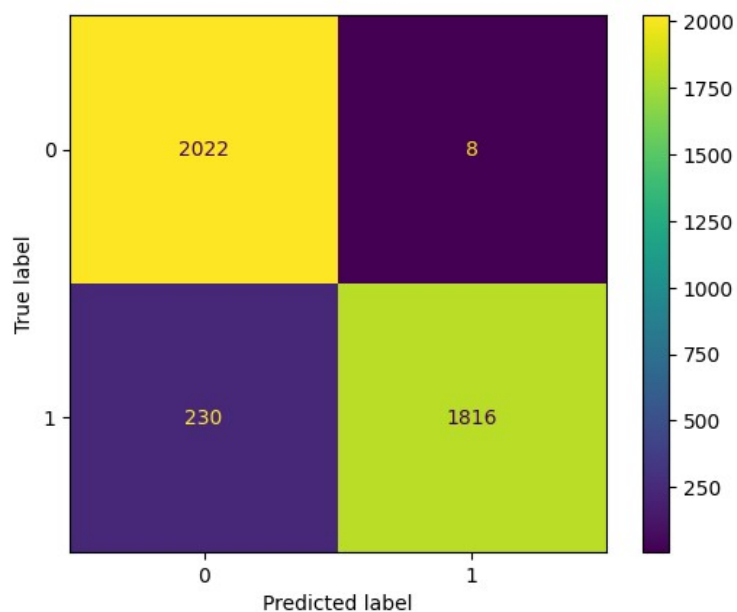

119

(A)

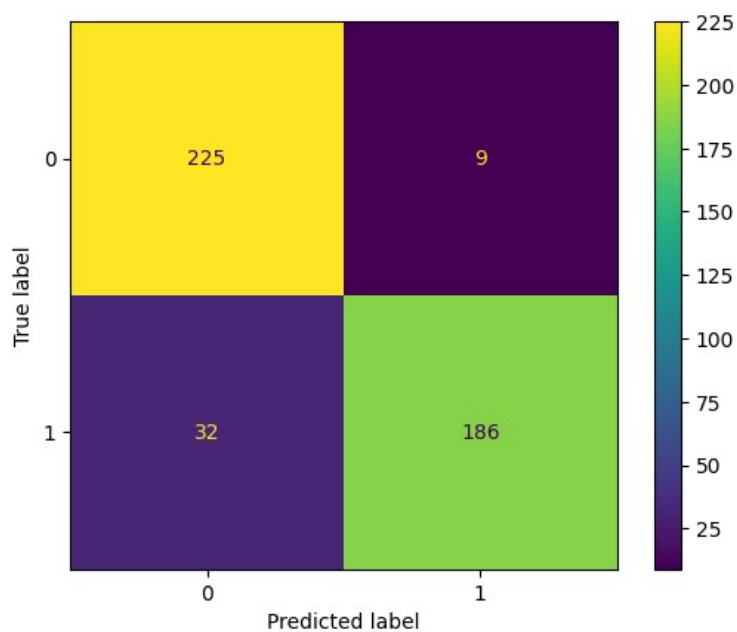

120

(B)

121 **Figure S12.** The confusion matrix for the ET classification models using  
122 resampling method and 10x5-nested cross-validation of the Bursi mutagenicity  
123 training (A) and validation (B) datasets.

124

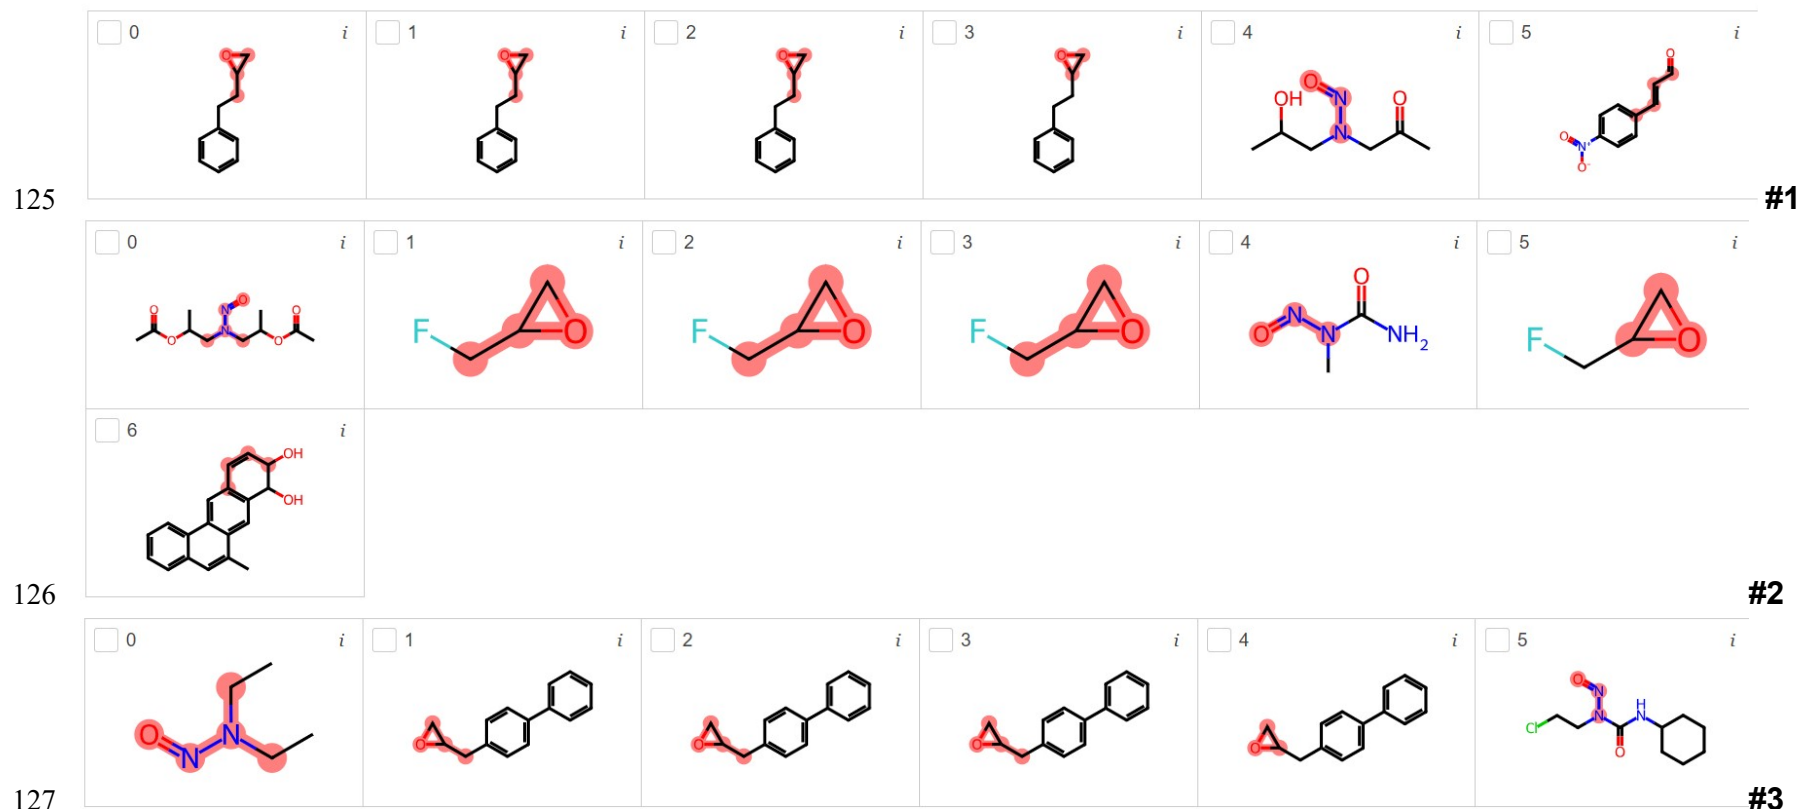

128 **Figure S13.** The most important substructures found by LIME for Bursi mutagenicity dataset using resampling method, 5-fold cross-  
 129 validation, and the RF classification model for runs #1, #2, and #3.



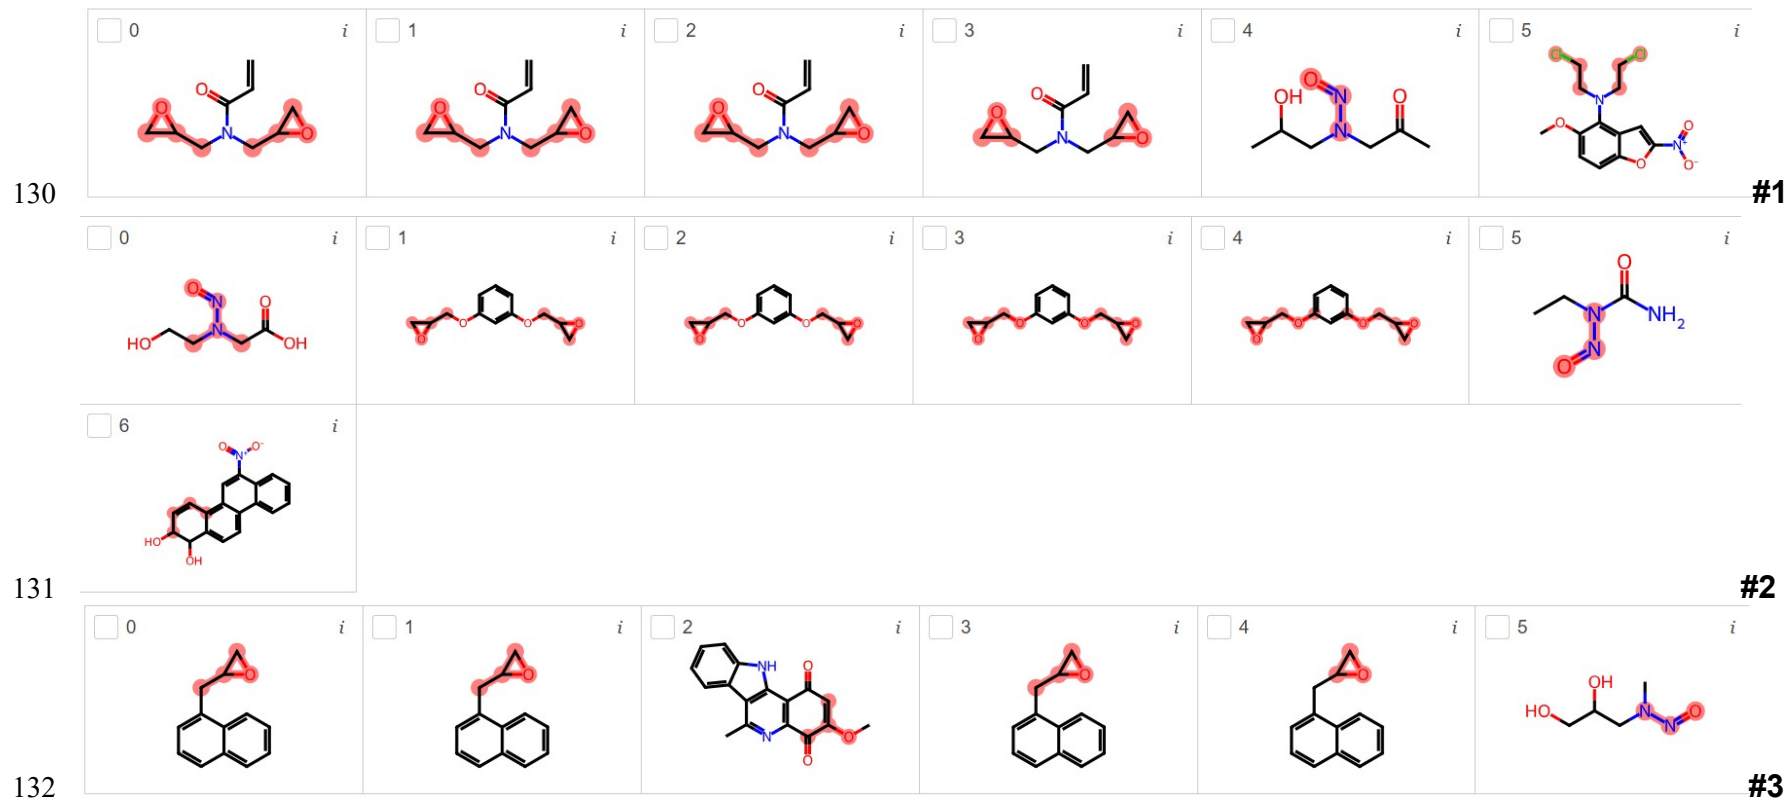

133 **Figure S14.** The most important substructures found by LIME for Bursi mutagenicity dataset using resampling method, 5-fold cross-  
 134 validation, and the ET classification model for runs #1, #2, and #3.  
 135

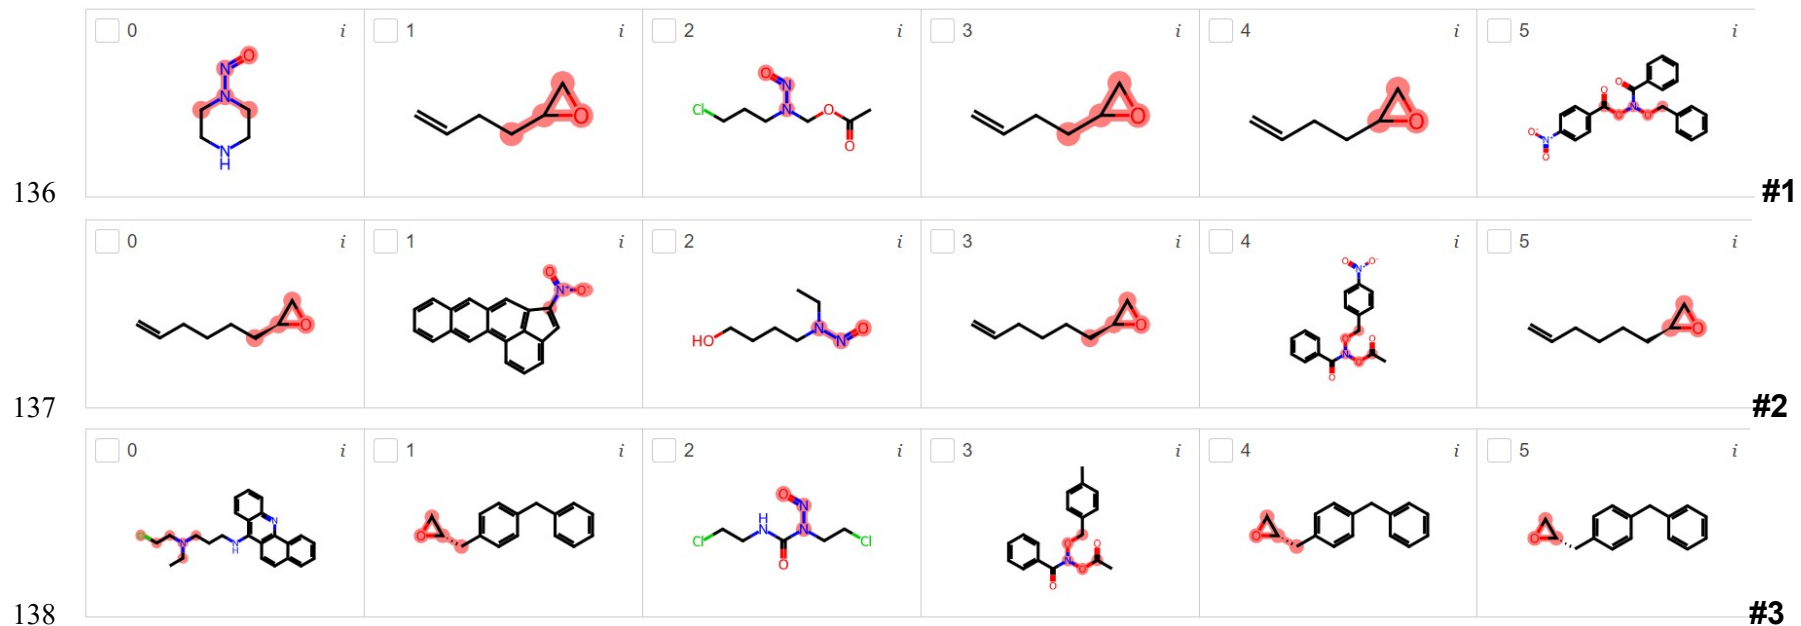

139 **Figure S15.** The most important substructures found by LIME for Hansen mutagenicity dataset using resampling method, 5-fold cross-  
 140 validation, and the RF classification model for runs #1, #2, and #3.

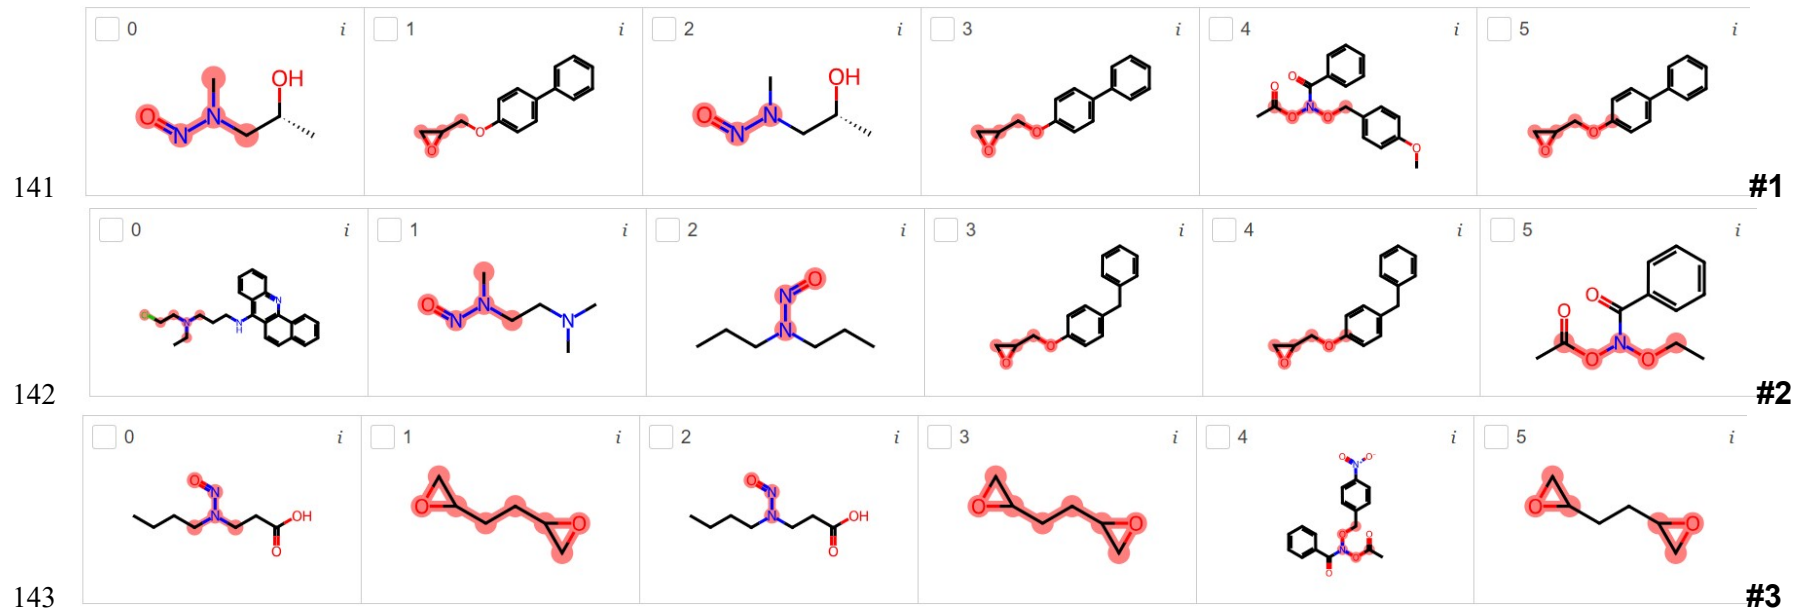

144 **Figure S16.** The most important substructures found by LIME for Hansen mutagenicity dataset using resampling method, 5-fold cross-  
 145 validation, and the ET classification model for runs #1, #2, and #3.

146

147

148  
149

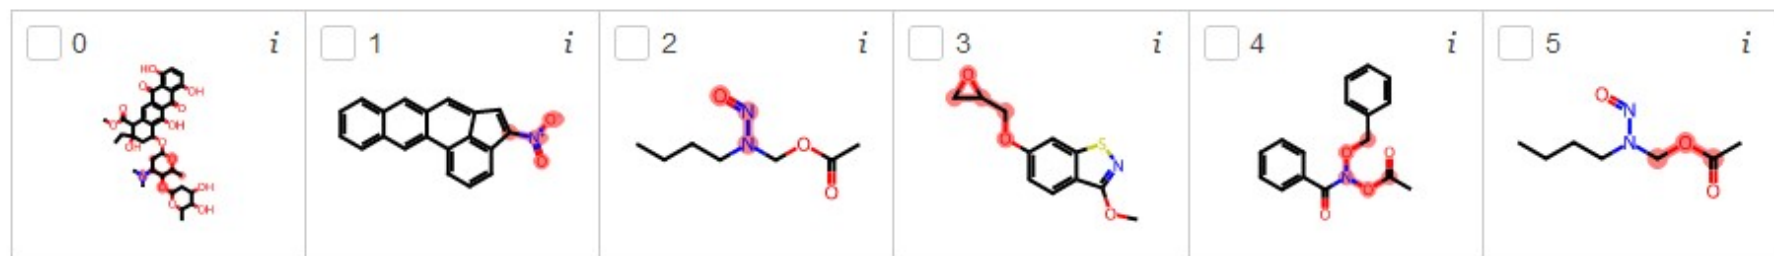

150

(A)

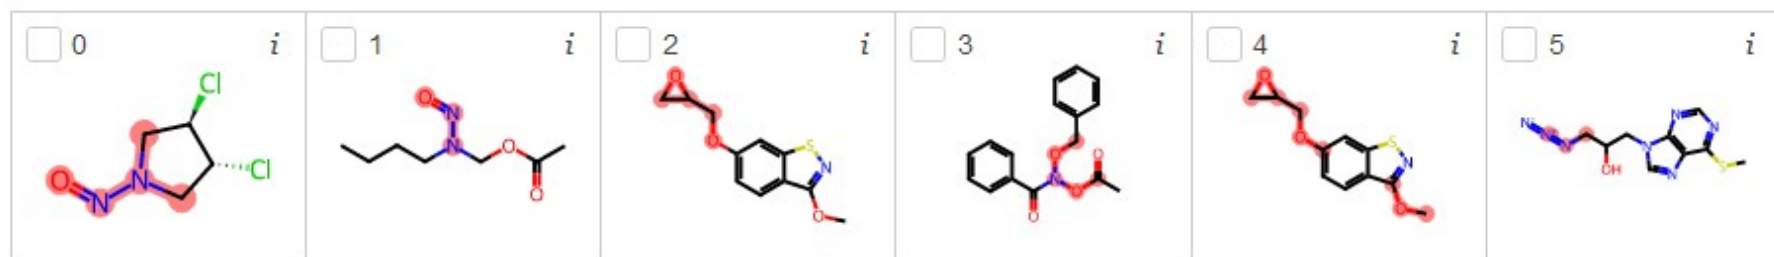

151  
152

(B)

153 **Figure S17.** The most important substructures found by LIME for Hansen mutagenicity dataset using resampling method, 10x5-nested  
154 cross-validation, and the RF (A) and ET (B) classification models.

155  
156

157  
158

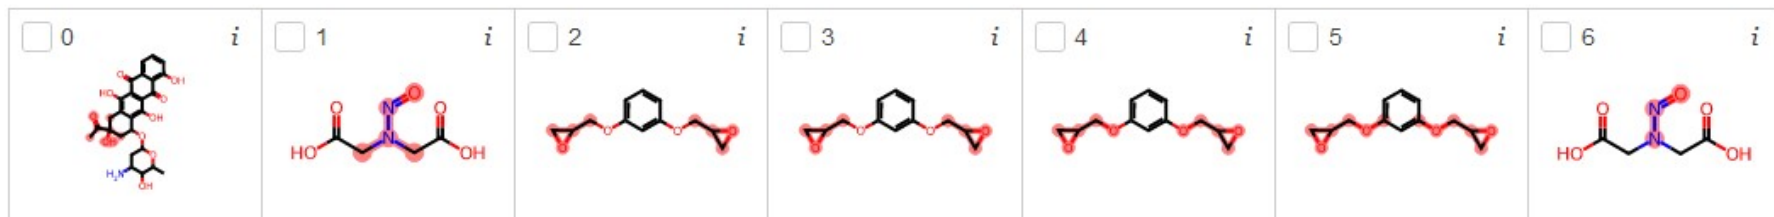

159

(A)

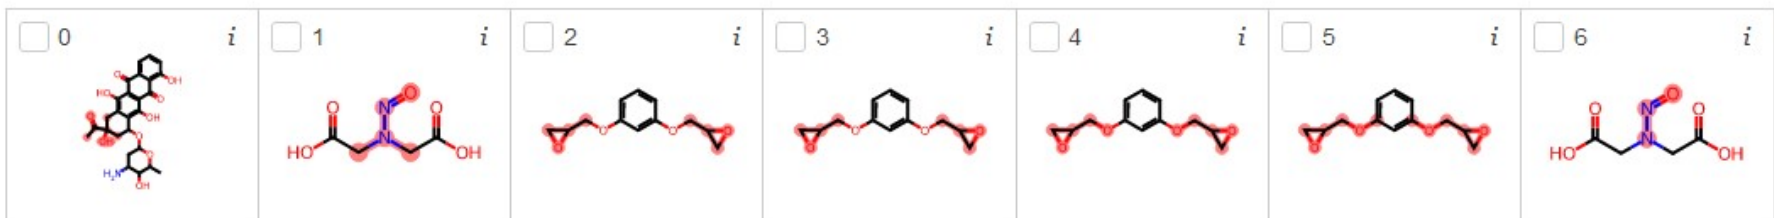

160

(B)

161

162 **Figure S18.** The most important substructures found by LIME for Bursi mutagenicity dataset using resampling method, 10x5-nested  
163 cross-validation, and the RF (A) and ET (B) classification models.

164

165
